# Supplementary material for: Placental uptake and metabolism of 25(OH)vitamin D determine its activity within the fetoplacental unit
Source: eLife. 2022 Mar 8;11:e71094. doi: 10.7554/eLife.71094 (PMC8903835; doi:10.7554/eLife.71094)
Supplement: Figure 1—source data 1. [file elife-71094-fig1-data1.xlsx]

## Sheet: Sheet1
RATE											RATE
13C-25(OH)D3	Maternal										13C-25OHD3	Fetal	0
nmol/min	252	254	275	343	402	Mean	stdev	SEM			nmol/min	252	254	275	343	402	Mean	stdev	SEM
loss 300 min	0.137933	0.0450576	0.0242671	0.0800523	0.120063						gain 300 min	0.00929768	0.0116147	0.000746463	0.0157855	0.00755728
g	35.07	52.8	36.8	28.6	17.7						g	35.07	52.8	36.8	28.6	17.7
pmol loss/g	3.93307	0.853364	0.659433	2.79903	6.78321	3.00562	2.51544	1.12494		fetal	pmol gain/g	0.265118	0.219975	0.0202843	0.551942	0.426965	0.296857	0.203351	0.0909415
met pmol/min/g	2.20561	0.600971	0.49247	2.1466	5.83432	2.256	2.16033	0.966128			plac pmol/min/g	1.46234	0.0324178	0.146679	0.100492	0.52192	0.45277	0.595503	0.266317
13C-24,25(OH)D3
nmol/min/g	Placenta	Maternal	Fetal
252	1.67164	3.82884	0.75928
254	0.0644609	2.46549	0.434766
275	0.110478	2.34764	0.16358
343	0.173873	2.08736	1.47638
402	0.494993	1.76368	0.698095
Mean	0.503089	2.4986	0.70642
stdev	0.67463	0.790988	0.490962
SEM	0.301704	0.353741	0.219565
1,25(OH)D3	Maternal
300 min		pmol/min	g	pmol/min/g	fmol/min/g	Mean	stdev	SEM
M 252	0.931242	0.00344904	35.07	9.83474e-05	0.0983474
M 254	4.52925	0.0150975	52.8	0.000285937	0.285937
M 275	0.699939	0.00291641	36.8	7.92503e-05	0.0792503
M 343	1.73814	0.00643755	28.6	0.000225089	0.225089
M 402	0.504658	0.00560731	17.7	0.000316797	0.316797	0.201084	0.107894	0.0482515
placenta	5.1549	0.017183	35.07	0.000489963	0.489963
1,25(OH)D3	Fetal
F 252	0.232991	0.000776635	35.07	2.21453e-05	0.0221453
F 254	1.01694	0.00338979	52.8	6.42006e-05	0.0642006
F 275	0.272701	0.000909002	36.8	2.47011e-05	0.0247011
F 343	0.474954	0.00158318	28.6	5.53559e-05	0.0553559
F 402	0.17904	0.000596801	17.7	3.37176e-05	0.0337176	0.0400241	0.0188002	0.00840769
