# Supplementary material for: Placental uptake and metabolism of 25(OH)vitamin D determine its activity within the fetoplacental unit
Source: eLife. 2022 Mar 8;11:e71094. doi: 10.7554/eLife.71094 (PMC8903835; doi:10.7554/eLife.71094)
Supplement: Figure 3—source data 1. [file elife-71094-fig3-data1.xlsx]

## Sheet: Sheet1
a) CYP24A1 gene expression change (fold change)					b) FITC-BSA Uptake
	Control	25(OH)D	25(OH)D BSA			Temp	4C			Temp	37C
	1	11.88	32.6			Time (min)	mean	sem		Time (min)	mean	sem
	1	17.89	117.4			5	0.029291	0.008		5	0.108038	0.0263
	1	15.61	47.13			15	0.034454	0.014		15	0.259979	0.064
	1	5.82	8.55			30	0.043553	0.018		30	0.471694	0.116
	1	2.2	40.05
	1	4.25	9.15
	1	2.01	5.55		c) CYP24A1 gene expression change (fold change)
	1	8.03	13.06			Blocker	mean	sem
	1	4.4	23.38			None	12.35	2.78
	1	10.77	24.44			Amiloride	1.29	0.32
	1	4.89	2.42			CytoD	1.34	0.36
	1	3.72	6.58			RAP	3.45	1.25
	1	1.69	4.35
	1	7.65	13.19
	1	53.2	127
