# Supplementary material for: Placental uptake and metabolism of 25(OH)vitamin D determine its activity within the fetoplacental unit
Source: eLife. 2022 Mar 8;11:e71094. doi: 10.7554/eLife.71094 (PMC8903835; doi:10.7554/eLife.71094)
Supplement: Supplementary file 1. [file elife-71094-supp1.xlsx]

## Sheet: DE genes UP
Genes	Symbol	logFC	FDR
ENSG00000019186	cyp24a1	4.4065	1.07e-31
ENSG00000123612	ACVR1C	3.31708	1.07856e-17
ENSG00000135436	FAM186B	3.01676	1.71483e-14
ENSG00000174226	SNX31	3.01061	3.98743e-17
ENSG00000179564	LSMEM2	2.54996	3.71614e-09
ENSG00000250519		2.54484	5.07889e-08
ENSG00000105371	ICAM4	2.33125	6.46438e-13
ENSG00000255202	LOC105376617	2.24817	3.48929e-07
ENSG00000215483	LINC00548	2.2381	3.8908e-11
ENSG00000280054		2.0341	2.60573e-06
ENSG00000273599		2.02739	1.4965e-06
ENSG00000164404	GDF9	1.99798	1.19231e-06
ENSG00000008300	MIR4793	1.98314	8.70865e-06
ENSG00000185900	POMK	1.9252	1.85228e-08
ENSG00000230069		1.90987	1.86465e-05
ENSG00000228037	LOC100996583	1.89745	5.27571e-06
ENSG00000178502	KLHL11	1.8321	6.30507e-11
ENSG00000243629	LINC00880	1.82839	5.37126e-05
ENSG00000240032		1.82612	3.41218e-06
ENSG00000235499		1.78446	0.00133823
ENSG00000237927		1.77279	0.000108664
ENSG00000105376	ICAM5	1.75958	5.81801e-10
ENSG00000231966		1.72325	0.000758952
ENSG00000232586		1.70273	1.67095e-05
ENSG00000160051	IQCC	1.6996	5.47099e-07
ENSG00000188167	TMPPE	1.67435	1.5409e-06
ENSG00000279283		1.67261	0.000262039
ENSG00000186472	PCLO	1.65867	0.00033146
ENSG00000246560	LOC105377348	1.65695	0.000196346
ENSG00000165194	PCDH19	1.64668	8.44862e-06
ENSG00000233930	KRTAP5-AS1	1.63202	0.000777162
ENSG00000224295		1.61642	5.62523e-05
ENSG00000278341		1.5945	0.000218242
ENSG00000245025	LOC107986927	1.55201	0.000592247
ENSG00000104808	DHDH	1.52346	0.0041341
ENSG00000260910	LINC00565	1.52275	0.000436576
ENSG00000274070	GATSL2	1.50993	0.000206071
ENSG00000241217		1.47796	1.67095e-05
ENSG00000169760	nlgn1	1.47439	0.000697
ENSG00000248971		1.47352	0.00164858
ENSG00000158220	ESYT3	1.47028	0.00276812
ENSG00000021645	NRXN3	1.46228	5.58174e-07
ENSG00000119737	GPR75	1.45689	0.000204214
ENSG00000165140	FBP1	1.42956	0.00593533
ENSG00000164236	ANKRD33B	1.4041	3.971e-08
ENSG00000182308	DCAF4L1	1.40309	0.000313444
ENSG00000272899	LOC100130705	1.39799	0.00379112
ENSG00000164070	HSPA4L	1.38762	0.000206938
ENSG00000257298		1.38545	0.000305959
ENSG00000100985	MMP9	1.36074	0.0156192
ENSG00000122696	SLC25A51	1.35017	2.16303e-05
ENSG00000007314	SCN4A	1.34813	0.0052409
ENSG00000284411		1.34514	0.0089417
ENSG00000159588	ccdc17	1.34374	0.0471639
ENSG00000249007		1.34199	0.000715188
ENSG00000213144		1.33238	0.0163445
ENSG00000249459	ZNF286B	1.3198	0.0157026
ENSG00000208005	Mir503	1.31107	0.0405115
ENSG00000274286	ADRA2B	1.3042	0.0071461
ENSG00000239653	PSMD6-AS2	1.29974	0.000715188
ENSG00000241322	CDRT1	1.29104	0.0052409
ENSG00000185838	GNB1L	1.26172	0.00293486
ENSG00000188897	LOC400499	1.25712	0.000917863
ENSG00000213190	MLLT11	1.24754	0.000715188
ENSG00000170689	HOXB9	1.24693	0.000436576
ENSG00000270210		1.24577	0.00100364
ENSG00000140598	EFL1	1.24518	2.07495e-06
ENSG00000105852	PON3	1.24014	0.00709558
ENSG00000158022	TRIM63	1.23759	0.00247324
ENSG00000118655	DCLRE1B	1.23568	0.013996
ENSG00000175518	UBQLNL	1.23427	0.0029986
ENSG00000103489	XYLT1	1.22754	3.15598e-06
ENSG00000260633		1.22228	0.00133823
ENSG00000189420	ZFP92	1.22164	0.00171109
ENSG00000184305	CCSER1	1.2214	0.0146426
ENSG00000196110	ZNF699	1.21786	0.000506904
ENSG00000272625		1.21584	0.00573296
ENSG00000156206	CFAP161	1.21101	0.00184348
ENSG00000260940		1.20902	0.0146686
ENSG00000112182	BACH2	1.20644	8.46015e-07
ENSG00000232098		1.19945	0.00428512
ENSG00000165185	KIAA1958	1.19754	0.000466356
ENSG00000140015	KCNH5	1.1958	0.0463207
ENSG00000196632	WNK3	1.19383	0.000607628
ENSG00000273172		1.19217	0.0128552
ENSG00000177614	PGBD5	1.19171	0.00106565
ENSG00000186416	NKRF	1.19053	1.58954e-05
ENSG00000224420	ADM5	1.18518	0.021726
ENSG00000187801	ZFP69B	1.17781	0.00674834
ENSG00000279329		1.1774	0.0171239
ENSG00000278987		1.17689	0.0180169
ENSG00000197140	ADAM32	1.17666	0.013353
ENSG00000259623		1.17446	0.00179671
ENSG00000165655	ZNF503	1.16663	0.0347572
ENSG00000175147	TMEM51-AS1	1.16097	0.00235728
ENSG00000170500	LONRF2	1.1556	0.0146686
ENSG00000248103		1.15314	0.0052409
ENSG00000259856		1.15093	0.0375949
ENSG00000215447		1.13787	0.00218538
ENSG00000261888		1.13543	0.00663362
ENSG00000177125	zbtb34	1.13429	6.75069e-06
ENSG00000214185		1.13156	0.00268025
ENSG00000111405	ENDOU	1.12241	0.00146037
ENSG00000226979	LTA	1.11815	0.0109423
ENSG00000183196	CHST6	1.11771	0.027295
ENSG00000149289	ZC3H12C	1.11555	0.000283944
ENSG00000168143	FAM83B	1.11121	0.00619514
ENSG00000260920		1.10538	0.0209004
ENSG00000205085	FAM71F2	1.10361	0.00805019
ENSG00000147421	HMBOX1	1.10345	0.00102873
ENSG00000154874	Ccdc144b	1.09744	0.000215346
ENSG00000103449	SALL1	1.09528	0.0230945
ENSG00000143674	MLK4	1.09514	0.004925
ENSG00000230454		1.09134	0.0092714
ENSG00000111981	ULBP1	1.08654	0.0164462
ENSG00000259287		1.08531	0.027305
ENSG00000126583	prkcg	1.08502	0.0131225
ENSG00000177732	SOX12	1.08462	0.0331052
ENSG00000116761	CTH	1.07445	0.000458636
ENSG00000102290	PCDH11X	1.07403	0.0146686
ENSG00000118432	CNR1	1.0712	0.0144796
ENSG00000144426	NBEAL1	1.07118	0.000604564
ENSG00000281896		1.07031	0.00148076
ENSG00000198482	ZNF808	1.06819	0.00211656
ENSG00000068976	PYGM	1.06538	0.0276423
ENSG00000279175		1.06318	0.0338448
ENSG00000269825		1.06285	0.00033146
ENSG00000104447	TRPS1	1.05615	0.00573296
ENSG00000182224	CYB5D1	1.05513	0.0109423
ENSG00000186230	ZNF749	1.04813	0.00480398
ENSG00000272462		1.04764	0.0237179
ENSG00000244879	MIR4712	1.04733	0.0052409
ENSG00000164532	TBX20	1.04097	0.00275252
ENSG00000250771	LOC100419170	1.03292	0.00640637
ENSG00000152495	CAMK4	1.03279	0.0171239
ENSG00000198205	ZXDA	1.02998	0.00961785
ENSG00000188295	ZNF669	1.02744	0.00717076
ENSG00000077264	PAK3	1.02392	0.0364799
ENSG00000279041		1.02166	0.00235728
ENSG00000172244	C5orf34	1.01911	0.0396067
ENSG00000204315	FKBPL	1.01669	0.0199613
ENSG00000169684	CHRNA5	1.01612	0.0110716
ENSG00000174010	KLHL15	1.01482	0.00473781
ENSG00000260852	FBXL19-AS1	1.01324	0.00551484
ENSG00000182885	ADGRG3	1.01039	0.00647494
ENSG00000181690	PLAG1	1.00787	0.00478724
ENSG00000187605	tet3	1.00634	0.00218201
ENSG00000104140	rhov	1.00537	0.000585434
ENSG00000178409	BEND3	1.00458	0.0052409
ENSG00000117707	PROX1	0.998353	0.00062725
ENSG00000198743	SLC5A3	0.995344	0.015236
ENSG00000183091	NEB	0.990306	0.00771746
ENSG00000126705	AHDC1	0.980157	0.0423677
ENSG00000069667	RORA	0.979376	0.00288914
ENSG00000143126	CELSR2	0.975731	0.00961785
ENSG00000160007	arhgap35	0.969658	0.00062725
ENSG00000248905	FMN1	0.96905	0.00315167
ENSG00000131941	RHPN2	0.968691	0.00297135
ENSG00000100625	SIX4	0.968029	0.00164978
ENSG00000114739	ACVR2B	0.958909	0.0015713
ENSG00000152217	SETBP1	0.956564	0.000744227
ENSG00000097096	SYDE2	0.956327	0.00294486
ENSG00000146411	SLC2A12	0.955129	0.0375949
ENSG00000016082	ISL1	0.954778	0.0210125
ENSG00000125834	STK35	0.95473	0.000458636
ENSG00000135631	rab11fip5	0.952242	0.0030132
ENSG00000223547	ZNF844	0.950999	0.027943
ENSG00000144445	KANSL1L	0.949265	0.000941435
ENSG00000189114	BLOC1S3	0.947847	0.00484886
ENSG00000179454	KLHL28	0.947705	0.000592247
ENSG00000124766	SOX4	0.943568	0.00573296
ENSG00000010818	HIVEP2	0.94262	0.00388415
ENSG00000131773	KHDRBS3	0.942566	0.00315035
ENSG00000196233	C10orf12	0.939874	0.00355997
ENSG00000197933	ZNF823	0.93762	0.00261763
ENSG00000177272	KCNA3	0.937515	0.0258722
ENSG00000080298	RFX3	0.936194	0.00604606
ENSG00000132801	ZSWIM3	0.934204	0.0360972
ENSG00000204128	C2orf72	0.932357	0.00961785
ENSG00000115112	TFCP2L1	0.932121	0.0413405
ENSG00000137502	RAB30	0.930694	0.0103919
ENSG00000174705	SH3PXD2B	0.930542	0.00173691
ENSG00000108375	RNF43	0.929355	0.00343132
ENSG00000276603		0.922449	0.0358746
ENSG00000149639	SOGA1	0.919303	0.00180724
ENSG00000183723	CMTM4	0.917296	0.0029986
ENSG00000110987	BCL7A	0.917048	0.0332959
ENSG00000140450	ARRDC4	0.913076	0.00237267
ENSG00000241360	PDXP	0.909633	0.00998776
ENSG00000264522	OTUD7B	0.90889	0.000991467
ENSG00000156675	RAB11FIP1	0.908301	0.00315035
ENSG00000187678	SPRY4	0.907028	0.00164978
ENSG00000141570	CBX8	0.90669	0.0168619
ENSG00000175073	VCPIP1	0.903216	0.00164858
ENSG00000101236	RNF24	0.903175	0.00244589
ENSG00000205181	LINC00654	0.90153	0.0383728
ENSG00000020577	SAMD4A	0.901073	0.00571929
ENSG00000082898	XPO1	0.899294	0.00262995
ENSG00000170604	IRF2BP1	0.896474	0.017638
ENSG00000130749	ZC3H4	0.895845	0.003645
ENSG00000178665	ZNF713	0.893534	0.0269586
ENSG00000140807	NKD1	0.89296	0.00428512
ENSG00000261556	SMG1P7	0.892799	0.0413405
ENSG00000139725	RHOF	0.892489	0.00961785
ENSG00000067141	NEO1	0.891771	0.0256395
ENSG00000110723	EXPH5	0.890822	0.0168619
ENSG00000261609	MIR4720	0.89068	0.0156849
ENSG00000229419	RALGAPA1P1	0.889439	0.0168263
ENSG00000152056	AP1S3	0.886378	0.0340045
ENSG00000109906	ZBTB16	0.883911	0.0107822
ENSG00000121274	PAPD5	0.883253	0.0052409
ENSG00000081019	RSBN1	0.882188	0.00946796
ENSG00000169914	OTUD3	0.881316	0.00269328
ENSG00000261578		0.879802	0.0405115
ENSG00000235823		0.870847	0.0135971
ENSG00000014914	MTMR11	0.867462	0.00235728
ENSG00000173320	STOX2	0.864518	0.0150838
ENSG00000122863	CHST3	0.863155	0.00293486
ENSG00000158292	GPR153	0.862508	0.0273755
ENSG00000274211	SOCS7	0.862351	0.00341858
ENSG00000281183	NPTN-IT1	0.861609	0.00709558
ENSG00000167074	TEF	0.861219	0.004925
ENSG00000183496	MEX3B	0.860203	0.00379112
ENSG00000197822	OCLN	0.860127	0.0161277
ENSG00000180667	YOD1	0.859339	0.030434
ENSG00000114796	KLHL24	0.857516	0.00442909
ENSG00000116141	mark1	0.857249	0.0128552
ENSG00000154429	CCSAP	0.857008	0.00619514
ENSG00000172349	IL16	0.856514	0.00235728
ENSG00000158258	CLSTN2	0.8544	0.0360972
ENSG00000180357	ZNF609	0.850298	0.00640637
ENSG00000154898		0.844015	0.0354408
ENSG00000131480	AOC2	0.841526	0.0244355
ENSG00000236901	MIR600	0.839072	0.0264644
ENSG00000140022	STON2	0.837466	0.0290839
ENSG00000128268	MGAT3	0.835551	0.00647494
ENSG00000120913	PDLIM2	0.835425	0.0166403
ENSG00000119669	IRF2BPL	0.835397	0.00734787
ENSG00000110400	NECTIN1	0.829331	0.00961785
ENSG00000113448	PDE4D	0.826899	0.00574693
ENSG00000019485	Prdm11	0.826777	0.0121584
ENSG00000259366		0.825466	0.0239023
ENSG00000084093	REST	0.824983	0.00261763
ENSG00000040199	PHLPP2	0.820709	0.00573296
ENSG00000197971	MBP	0.819383	0.0164462
ENSG00000251194		0.819306	0.047693
ENSG00000114859	CLCN2	0.818241	0.0370299
ENSG00000164916	FOXK1	0.814378	0.0193517
ENSG00000160179	ABCG1	0.811373	0.00899679
ENSG00000110851	prdm4	0.811208	0.00297174
ENSG00000186575	NF2	0.81074	0.00961785
ENSG00000116539	ASH1L	0.807897	0.010493
ENSG00000196323	ZBTB44	0.804746	0.0262842
ENSG00000160551	MIR4523	0.804729	0.0146426
ENSG00000152127	MGAT5	0.80382	0.0241369
ENSG00000167106	FAM102A	0.802164	0.00775309
ENSG00000170921	TANC2	0.801812	0.0184038
ENSG00000135709	KIAA0513	0.800854	0.0256454
ENSG00000172840	PDP2	0.800487	0.0144683
ENSG00000166450	PRTG	0.800133	0.0225192
ENSG00000183741	CBX6	0.799986	0.0379839
ENSG00000139318	DUSP6	0.798603	0.0167666
ENSG00000186951	PPARA	0.798127	0.0125485
ENSG00000111799	COL12A1	0.795681	0.02795
ENSG00000064393	HIPK2	0.795208	0.0471639
ENSG00000118263	KLF7	0.793728	0.00759943
ENSG00000162924	REL	0.791922	0.0144439
ENSG00000115339	GALNT3	0.791769	0.0354024
ENSG00000243156	MICAL3	0.791042	0.0110716
ENSG00000163960	UBXN7	0.790322	0.0262581
ENSG00000164603	BMT2	0.786707	0.0327649
ENSG00000162522	KIAA1522	0.784617	0.0175406
ENSG00000115977	AAK1	0.784321	0.0146686
ENSG00000181588	MEX3D	0.783963	0.0327649
ENSG00000106571	GLI3	0.780426	0.0120018
ENSG00000060237	WNK1	0.780191	0.00763494
ENSG00000146592	CREB5	0.775952	0.0109658
ENSG00000110395	CBL	0.774979	0.0448908
ENSG00000146535	GNA12	0.772446	0.0110716
ENSG00000183853	KIRREL	0.771597	0.0239547
ENSG00000065923	SLC9A7	0.770155	0.0216632
ENSG00000155592	ZKSCAN2	0.769997	0.0175406
ENSG00000140948	ZCCHC14	0.769554	0.00959418
ENSG00000100393	MIR1281	0.768595	0.00961785
ENSG00000173542	MOB1B	0.765552	0.014894
ENSG00000167081	PBX3	0.76475	0.0256454
ENSG00000144893	MED12L	0.76418	0.0346716
ENSG00000139645	ANKRD52	0.763595	0.00848959
ENSG00000095951	hivep1	0.762924	0.0364567
ENSG00000126070	AGO3	0.761889	0.0220815
ENSG00000164626	KCNK5	0.760915	0.0150838
ENSG00000060749	QSER1	0.759663	0.0146686
ENSG00000146858	ZC3HAV1L	0.758317	0.0219286
ENSG00000116903	EXOC8	0.757934	0.0175406
ENSG00000165434	PGM2L1	0.756883	0.0203028
ENSG00000102908	NFAT5	0.754255	0.0205976
ENSG00000109458	GAB1	0.750972	0.0405115
ENSG00000152409	JMY	0.750043	0.00961785
ENSG00000163376	KBTBD8	0.748136	0.0496576
ENSG00000198431	TXNRD1	0.744361	0.0327649
ENSG00000005339	CREBBP	0.74	0.0146426
ENSG00000152503	TRIM36	0.738367	0.0277442
ENSG00000177888	ZBTB41	0.737732	0.0256488
ENSG00000103994	ZNF106	0.737071	0.0171239
ENSG00000167548	KMT2D	0.73692	0.0340045
ENSG00000152990	adgra3	0.736634	0.0364799
ENSG00000176624	MEX3C	0.735431	0.0110711
ENSG00000171634	BPTF	0.73414	0.0467528
ENSG00000099194	SCD	0.727609	0.0180169
ENSG00000182580	EPHB3	0.724936	0.0398184
ENSG00000146587	RBAK	0.724387	0.0263624
ENSG00000125484	GTF3C4	0.724287	0.0360972
ENSG00000261716		0.722826	0.0262842
ENSG00000115568	ZNF142	0.721143	0.0372152
ENSG00000079482	OPHN1	0.72048	0.0433719
ENSG00000170677	SOCS6	0.719866	0.0220815
ENSG00000267041	ZNF850	0.718673	0.0359312
ENSG00000105866	SP4	0.718045	0.0495721
ENSG00000081913	PHLPP1	0.715947	0.0154486
ENSG00000130338	TULP4	0.714081	0.0282068
ENSG00000052795	FNIP2	0.713459	0.0480597
ENSG00000118689	FOXO3	0.712231	0.0157026
ENSG00000146966	DENND2A	0.709223	0.0489092
ENSG00000084112	SSH1	0.70903	0.0202619
ENSG00000164684	ZNF704	0.705271	0.0455714
ENSG00000155545	MIER3	0.704132	0.028047
ENSG00000055609	KMT2C	0.703552	0.0412022
ENSG00000205189	ZBTB10	0.703061	0.0464655
ENSG00000136720	HS6ST1	0.701632	0.0264644
ENSG00000179833	SERTAD2	0.700695	0.0181345
ENSG00000259956	RBM15B	0.698806	0.0405115
ENSG00000113742	CPEB4	0.697796	0.0171239
ENSG00000099942	CRKL	0.697103	0.0168263
ENSG00000005810	MYCBP2	0.695457	0.028047
ENSG00000198740	ZNF652	0.6945	0.0371139
ENSG00000173064	MIR6861	0.68558	0.0184038
ENSG00000197779	ZNF81	0.68357	0.0461965
ENSG00000133884	DPF2	0.683515	0.0282068
ENSG00000182903	znf721	0.682613	0.0441595
ENSG00000165671	NSD1	0.679335	0.0421101
ENSG00000072518	MARK2	0.677488	0.0279904
ENSG00000213626	LBH	0.673652	0.0299885
ENSG00000054523	KIF1B	0.671955	0.0343971
ENSG00000176994	SMCR8	0.665902	0.0242236
ENSG00000198455	ZXDB	0.664363	0.0453434
ENSG00000213064	SFT2D2	0.662853	0.0360972
ENSG00000163428	LRRC58	0.662732	0.0376788
ENSG00000100852	ARHGAP5	0.661538	0.0406612
ENSG00000197555	SIPA1L1	0.655939	0.0454201
ENSG00000169155	ZBTB43	0.649291	0.0433276
ENSG00000174579	MSL2	0.64262	0.0467608
ENSG00000012232	EXTL3	0.640807	0.0489092
ENSG00000164574	GALNT10	0.640545	0.0479876
ENSG00000167258	CDK12	0.636975	0.0360972
ENSG00000224470	ATXN1L	0.632499	0.0426169
ENSG00000163602	RYBP	0.625929	0.0406612
ENSG00000154124	OTULIN	0.62482	0.0442584
ENSG00000107554	dnmbp	0.621894	0.0486412

## Sheet: DE genes DOWN
Genes	Symbol	logFC	FDR
ENSG00000183395	pmch	-3.05404	1.67066e-06
ENSG00000165799	RNASE7	-2.67707	1.71483e-14
ENSG00000149968	MMP3	-2.45159	0.00619514
ENSG00000102794	ACOD1	-2.21159	0.000917863
ENSG00000166396	SERPINB7	-2.14055	0.000553352
ENSG00000124102	PI3	-2.0762	2.71269e-09
ENSG00000127533	F2RL3	-1.93158	0.000944064
ENSG00000203635		-1.89445	0.021473
ENSG00000226380	Mir29a	-1.8853	1.19231e-06
ENSG00000164220	f2rl2	-1.88525	0.00573296
ENSG00000169245	CXCL10	-1.82911	2.7974e-07
ENSG00000163221	S100A12	-1.82909	2.97844e-06
ENSG00000163209	SPRR3	-1.78957	0.00288914
ENSG00000269902		-1.78788	5.59603e-05
ENSG00000164400	CSF2	-1.76279	0.00175542
ENSG00000251450	RASGRF2-AS1	-1.75561	2.45695e-05
ENSG00000280219		-1.7432	3.76426e-09
ENSG00000228613		-1.7304	0.00379112
ENSG00000276107		-1.72074	2.65225e-10
ENSG00000145777	TSLP	-1.6976	0.00222344
ENSG00000204936	CD177	-1.69633	0.000411291
ENSG00000228742		-1.66767	5.59603e-05
ENSG00000140465	CYP1A1	-1.66	0.00843048
ENSG00000169248	CXCL11	-1.64649	7.23199e-10
ENSG00000187957	DNER	-1.62625	0.00046316
ENSG00000164761	TNFRSF11B	-1.61957	1.5409e-06
ENSG00000143546	S100A8	-1.60242	2.52353e-07
ENSG00000159251	ACTC1	-1.56101	0.0317342
ENSG00000149573	MPZL2	-1.55865	0.000630578
ENSG00000276462		-1.53713	0.0182684
ENSG00000107984	DKK1	-1.52187	1.42417e-06
ENSG00000156265	MAP3K7CL	-1.49241	2.60573e-06
ENSG00000179862	CITED4	-1.4773	0.0282068
ENSG00000115590	IL1R2	-1.46933	0.0052409
ENSG00000128285	MCHR1	-1.46041	0.0121508
ENSG00000274297		-1.41294	0.0052409
ENSG00000027869	SH2D2A	-1.38896	0.00450999
ENSG00000276070	Ccl4l2	-1.38081	3.41218e-06
ENSG00000162894	FCMR	-1.36885	0.00701343
ENSG00000259207	ITGB3	-1.34825	0.00709694
ENSG00000134363	FST	-1.33992	5.68163e-05
ENSG00000197632	SERPINB2	-1.32012	0.0146901
ENSG00000125775	SDCBP2	-1.3076	0.0030132
ENSG00000165474	GJB2	-1.28719	0.0150838
ENSG00000012223	LTF	-1.28624	0.000354547
ENSG00000160886	Ly6k	-1.28455	0.000149028
ENSG00000105509	HAS1	-1.27155	0.015236
ENSG00000008517	IL32	-1.26947	5.66731e-05
ENSG00000102837	OLFM4	-1.26789	0.00204368
ENSG00000172399	MYOZ2	-1.2657	0.0163414
ENSG00000164283	ESM1	-1.25465	0.00164858
ENSG00000276337		-1.25453	0.0226194
ENSG00000162747	FCGR3B	-1.24938	0.00607058
ENSG00000118194	TNNT2	-1.22377	0.00961785
ENSG00000148346	LCN2	-1.21095	0.045403
ENSG00000162892	IL24	-1.19911	0.000917863
ENSG00000258297		-1.19882	0.000739922
ENSG00000136695	IL36RN	-1.18569	0.0199573
ENSG00000143816	WNT9A	-1.1681	0.027295
ENSG00000247516	MIR4458HG	-1.15903	0.010493
ENSG00000196209	SIRPB2	-1.15769	0.0432914
ENSG00000203857	hsd3b1	-1.14037	0.0104874
ENSG00000162645	GBP2	-1.13246	0.0228904
ENSG00000269899		-1.12207	0.00946796
ENSG00000187116	LILRA5	-1.11956	0.030434
ENSG00000138135	CH25H	-1.11927	0.00395081
ENSG00000134830	C5AR2	-1.11731	0.030115
ENSG00000224834		-1.11207	0.0326587
ENSG00000260257		-1.11126	0.00315035
ENSG00000185291	IL3RA	-1.10726	0.00604606
ENSG00000199477	Snora31	-1.09393	0.0269117
ENSG00000163661	PTX3	-1.0887	0.00171022
ENSG00000271614	LINC00936	-1.08672	0.0159725
ENSG00000174792	C4orf26	-1.08248	0.0270188
ENSG00000183486	MX2	-1.07561	0.0354408
ENSG00000134198	TSPAN2	-1.05872	0.00128604
ENSG00000053438	NNAT	-1.05368	0.00231472
ENSG00000175567	UCP2	-1.04011	0.00126031
ENSG00000100311	PDGFB	-1.0275	0.00995314
ENSG00000245532	NEAT1	-1.01826	0.00773482
ENSG00000159167	STC1	-1.01284	0.0210508
ENSG00000127954	STEAP4	-1.01246	0.00133142
ENSG00000166670	MMP10	-1.00928	0.0346716
ENSG00000108798	ABI3	-0.986976	0.0211675
ENSG00000268734		-0.972674	0.0185546
ENSG00000112799	LY86	-0.967451	0.0248564
ENSG00000189410	SH2D5	-0.952161	0.0412022
ENSG00000222041	CYTOR	-0.950865	0.000653158
ENSG00000275302	CCL4	-0.94887	0.00306034
ENSG00000139410	SDSL	-0.946568	0.0489092
ENSG00000249669	MIR143	-0.945858	0.0092714
ENSG00000177464	GPR4	-0.943938	0.0262842
ENSG00000115602	IL1RL1	-0.926442	0.0342449
ENSG00000111913	FAM65B	-0.926355	0.028393
ENSG00000198796	ALPK2	-0.919394	0.0238874
ENSG00000105825	TFPI2	-0.91673	0.000744227
ENSG00000123342	MMP19	-0.881461	0.034638
ENSG00000198794	SCAMP5	-0.881182	0.0391503
ENSG00000008838	MIR6884	-0.876021	0.0121508
ENSG00000141753	IGFBP4	-0.87545	0.0171239
ENSG00000132530	XAF1	-0.871145	0.00604606
ENSG00000283928		-0.87055	0.0454201
ENSG00000260401		-0.856367	0.0376788
ENSG00000103034	NDRG4	-0.855136	0.0226194
ENSG00000203747	FCGR3A	-0.854436	0.0465169
ENSG00000188643	S100A16	-0.839975	0.0221229
ENSG00000163736	PPBP	-0.836757	0.0347572
ENSG00000242221	PSG2	-0.82173	0.0144259
ENSG00000221826	psg3	-0.819451	0.0327649
ENSG00000197629	MPEG1	-0.818606	0.0117756
ENSG00000175592	fosl1	-0.815794	0.0462573
ENSG00000123843	C4BPB	-0.810935	0.0230029
ENSG00000062716	MIR21	-0.80711	0.047693
ENSG00000213934	HBG1	-0.80522	0.0174925
ENSG00000164929	BAALC	-0.800799	0.0209683
ENSG00000177675	CD163L1	-0.794507	0.0154486
ENSG00000171860	C3AR1	-0.788121	0.00961785
ENSG00000108691	CCL2	-0.77434	0.00467028
ENSG00000173372	C1QA	-0.768201	0.0282068
ENSG00000140749	IGSF6	-0.764439	0.0270188
ENSG00000110079	MS4A4A	-0.764331	0.00791472
ENSG00000204136	GGTA1P	-0.754304	0.0202615
ENSG00000100918	REC8	-0.747104	0.0462501
ENSG00000170891	CYTL1	-0.739863	0.0199573
ENSG00000243137	psg4	-0.738596	0.0267292
ENSG00000142227	EMP3	-0.732606	0.0499227
ENSG00000090924	PLEKHG2	-0.731956	0.0364799
ENSG00000150687	PRSS23	-0.730628	0.0337741
ENSG00000147168	IL2RG	-0.730428	0.0247284
ENSG00000132965	ALOX5AP	-0.72479	0.041582
ENSG00000176907	c8orf4	-0.705909	0.0204781
ENSG00000123610	TNFAIP6	-0.701132	0.0411894
ENSG00000165457	FOLR2	-0.694754	0.0317778
ENSG00000213089		-0.693697	0.0432914
ENSG00000196507	TCEAL3	-0.682061	0.0464655
