# Supplementary material for: Placental uptake and metabolism of 25(OH)vitamin D determine its activity within the fetoplacental unit
Source: eLife. 2022 Mar 8;11:e71094. doi: 10.7554/eLife.71094 (PMC8903835; doi:10.7554/eLife.71094)
Supplement: Supplementary file 2. [file elife-71094-supp2.xlsx]

## Sheet: hypermethylation
Chromosome	Start	End	Feature	Feature Strand	Feature Orientation	Distance
1	202679090	202679090	SYT2	-	overlapping	0
1	244008860	244008860	AKT3	-	downstream	974
2	503777	503777			Not found	0
2	26401879	26401879	FAM59B	+	downstream	706
2	50956660	50956660			Not found	0
2	95743039	95743039			Not found	0
2	133823375	133823375			Not found	0
2	145275878	145275878	ZEB2	-	overlapping	0
2	150176763	150176763			Not found	0
2	219857928	219857928	CRYBA2	-	overlapping	0
2	233286230	233286230	AC068134.6	-	overlapping	0
3	11685411	11685411	VGLL4	-	overlapping	0
3	11685457	11685457	VGLL4	-	overlapping	0
3	11685554	11685554	VGLL4	-	overlapping	0
3	11685596	11685596	VGLL4	-	overlapping	0
3	11685607	11685607	VGLL4	-	overlapping	0
3	127006288	127006288			Not found	0
3	147232333	147232333			Not found	0
3	180774457	180774457	SOX2-OT	+	overlapping	0
4	5710320	5710320	EVC2	-	overlapping	0
4	5710373	5710373	EVC2	-	overlapping	0
4	15081164	15081164			Not found	0
4	68033904	68033904			Not found	0
4	146654615	146654615	C4orf51	+	upstream	9
4	190225903	190225903			Not found	0
5	140474249	140474249	PCDHB2	+	overlapping	0
5	140614553	140614553			Not found	0
5	146614020	146614020	CTC-255N20.1	-	overlapping	0
5	169064072	169064072	DOCK2	+	overlapping	0
6	26614337	26614337			Not found	0
6	28733420	28733420			Not found	0
6	28733674	28733674			Not found	0
6	28733951	28733951			Not found	0
6	100059962	100059962			Not found	0
6	166666211	166666211			Not found	0
6	167032404	167032404			Not found	0
6	169654391	169654391	THBS2	-	overlapping	0
7	23287353	23287353	GPNMB	+	overlapping	0
7	23287421	23287421	GPNMB	+	upstream	27
7	68527679	68527679			Not found	0
7	86974811	86974811	TP53TG1	-	overlapping	0
7	86974834	86974834	TP53TG1	-	overlapping	0
7	86974957	86974957	TP53TG1	-	overlapping	0
7	157463693	157463693			Not found	0
8	2752783	2752783			Not found	0
8	65286245	65286245	RP11-32K4.2	+	overlapping	0
8	72984968	72984968	TRPA1	-	upstream	1884
8	144105571	144105571	LY6E	+	upstream	605
9	104501031	104501031	GRIN3A	-	overlapping	0
10	50886879	50886879	C10orf53	+	overlapping	0
10	76349279	76349279			Not found	0
10	131761151	131761151	EBF3	-	overlapping	0
10	133484611	133484611			Not found	0
11	3257490	3257490			Not found	0
11	40613631	40613631			Not found	0
11	42333244	42333244			Not found	0
11	77734335	77734335	RP11-7I15.4	+	overlapping	0
11	132148745	132148745			Not found	0
11	132513896	132513896			Not found	0
12	24103359	24103359	SOX5	-	overlapping	0
12	54185002	54185002			Not found	0
12	58931101	58931101			Not found	0
12	129678363	129678363			Not found	0
12	130389139	130389139	TMEM132D	-	overlapping	0
12	132930067	132930067			Not found	0
13	58207059	58207059	PCDH17	+	overlapping	0
13	78774499	78774499			Not found	0
13	81168094	81168094			Not found	0
13	112721713	112721713	SOX1	+	overlapping	0
14	25591077	25591077			Not found	0
14	37666928	37666928	MIPOL1	+	overlapping	0
14	67692702	67692702	FAM71D	+	downstream	486
15	25307417	25307417	SNHG14	+	downstream	1501
15	40211273	40211273	GPR176	-	overlapping	0
15	78031419	78031419			Not found	0
16	3493441	3493441	ZNF597	-	overlapping	0
16	7872444	7872444			Not found	0
16	52686869	52686869			Not found	0
16	56659337	56659337	MT1E	+	overlapping	0
16	56659339	56659339	MT1E	+	overlapping	0
16	56659553	56659553	MT1E	+	overlapping	0
18	38318459	38318459			Not found	0
19	8840786	8840786	OR2Z1	+	overlapping	0
19	51431476	51431476			Not found	0
19	57630525	57630525	USP29	+	overlapping	0
20	5279617	5279617			Not found	0
20	44842636	44842636			Not found	0
22	32546048	32546048	C22orf42	-	overlapping	0
22	37159713	37159713	IFT27	-	downstream	1567

## Sheet: hypomethylation
Chromosome	Start	End	Feature	Feature Strand	Feature Orientation	Distance
1	2707574	2707574	TTC34	-	downstream	294
1	2767082	2767082			Not found	0
1	5976041	5976041			Not found	0
1	7018950	7018950			Not found	0
1	7120927	7120927			Not found	0
1	7181418	7181418			Not found	0
1	16347985	16347985	CLCNKA	+	overlapping	0
1	91301732	91301732	RP4-665J23.1	-	overlapping	0
1	96124811	96124811			Not found	0
1	175048874	175048874	TNN	+	upstream	1349
1	194458735	194458735			Not found	0
1	208900752	208900752	RP11-459K23.2	+	downstream	281
2	817734	817734			Not found	0
2	1498139	1498139			Not found	0
2	1748618	1748618	PXDN	-	overlapping	0
2	1932997	1932997			Not found	0
2	2337094	2337094	MYT1L	-	downstream	1062
2	2875087	2875087	AC011995.3	-	overlapping	0
2	27938293	27938293	AC074091.13	-	overlapping	0
2	27938372	27938372	AC074091.13	-	overlapping	0
2	27938765	27938765	AC074091.13	-	overlapping	0
2	34628357	34628357			Not found	0
2	79878369	79878369	CTNNA2	+	overlapping	0
2	126468026	126468026	AC097499.1	+	overlapping	0
2	144355866	144355866	RP11-570L15.1	-	overlapping	0
2	145606432	145606432			Not found	0
2	147345338	147345338			Not found	0
2	177028622	177028622	HOXD3	+	overlapping	0
2	181370099	181370099			Not found	0
2	199240044	199240044	AC005235.1	-	overlapping	0
2	202982522	202982522	AC079354.3	-	overlapping	0
2	217675070	217675070			Not found	0
3	88031396	88031396			Not found	0
3	94581709	94581709			Not found	0
3	105157178	105157178	ALCAM	+	downstream	4
3	125712086	125712086			Not found	0
3	126922347	126922347			Not found	0
3	143847319	143847319			Not found	0
3	146535685	146535685			Not found	0
3	179964701	179964701			Not found	0
4	1256214	1256214			Not found	0
4	5526254	5526254	C4orf6	+	overlapping	0
4	7472892	7472892			Not found	0
4	16403622	16403622	RP11-446J8.1	+	overlapping	0
4	20286835	20286835			Not found	0
4	23505222	23505222			Not found	0
4	28754312	28754312	RP11-655M19.1	+	overlapping	0
4	30906190	30906190			Not found	0
4	43758626	43758626			Not found	0
4	66517156	66517156			Not found	0
4	114605748	114605748			Not found	0
4	141805606	141805606			Not found	0
4	189613072	189613072			Not found	0
4	190569727	190569727			Not found	0
4	190843007	190843007			Not found	0
5	520265	520265			Not found	0
5	927438	927438			Not found	0
5	1028395	1028395			Not found	0
5	1087096	1087096			Not found	0
5	1395157	1395157			Not found	0
5	2097053	2097053			Not found	0
5	2113671	2113671			Not found	0
5	3350496	3350496			Not found	0
5	6350737	6350737			Not found	0
5	17062512	17062512			Not found	0
5	41510117	41510117	PLCXD3	-	overlapping	0
5	92024080	92024080	CTC-529L17.2	-	overlapping	0
5	113805553	113805553			Not found	0
5	140602520	140602520	PCDHB14	+	overlapping	0
5	152069132	152069132	AC091969.1	-	overlapping	0
5	166354051	166354051	CTB-7E3.1	-	overlapping	0
5	170738275	170738275	TLX3	+	upstream	987
5	175270408	175270408			Not found	0
5	176225988	176225988			Not found	0
5	178804403	178804403	RP11-443C10.2	+	overlapping	0
6	431778	431778			Not found	0
6	7731070	7731070			Not found	0
6	10660287	10660287			Not found	0
6	29395738	29395738	OR11A1	-	overlapping	0
6	29870061	29870061			Not found	0
6	32175534	32175534			Not found	0
6	32408285	32408285	HLA-DRA	+	overlapping	0
6	32711029	32711029	HLA-DQA2	+	upstream	910
6	65969297	65969297			Not found	0
6	69420781	69420781			Not found	0
6	92636559	92636559			Not found	0
6	99281629	99281629	POU3F2	+	overlapping	0
6	162864416	162864416	PARK2	-	overlapping	0
6	167589879	167589879			Not found	0
7	170693	170693			Not found	0
7	1626154	1626154			Not found	0
7	3026389	3026389			Not found	0
7	3026460	3026460			Not found	0
7	15601986	15601986	AGMO	-	overlapping	0
7	15758937	15758937			Not found	0
7	19788120	19788120			Not found	0
7	26908494	26908494			Not found	0
7	57521048	57521048	ZNF716	+	downstream	59
7	120163094	120163094			Not found	0
7	141647962	141647962	CLEC5A	-	downstream	155
7	150217082	150217082			Not found	0
7	157608598	157608598			Not found	0
7	157624789	157624789			Not found	0
7	157786632	157786632			Not found	0
7	157879916	157879916			Not found	0
7	158114559	158114559			Not found	0
7	158377441	158377441	PTPRN2	-	upstream	1930
7	158378216	158378216	PTPRN2	-	upstream	1155
8	962419	962419			Not found	0
8	999695	999695			Not found	0
8	1004107	1004107			Not found	0
8	1041728	1041728			Not found	0
8	1340585	1340585			Not found	0
8	1509811	1509811			Not found	0
8	1942848	1942848			Not found	0
8	2078051	2078051	MYOM2	+	upstream	1266
8	2110783	2110783			Not found	0
8	5768937	5768937			Not found	0
8	11402220	11402220	BLK	+	downstream	20
8	24241695	24241695	ADAMDEC1	+	overlapping	0
8	24298404	24298404	ADAM7	+	overlapping	0
8	32606320	32606320	NRG1	+	overlapping	0
8	36637667	36637667	RP11-962G15.1	-	overlapping	0
8	50467296	50467296	RP11-738G5.2	-	overlapping	0
8	50837080	50837080			Not found	0
8	51292630	51292630	RP11-759A9.1	+	overlapping	0
8	57303609	57303609			Not found	0
8	58191611	58191611	C8orf71	+	overlapping	0
8	68862902	68862902	PREX2	+	downstream	451
8	75229443	75229443			Not found	0
8	90560884	90560884			Not found	0
8	116221396	116221396			Not found	0
8	116517020	116517020			Not found	0
8	117148687	117148687			Not found	0
8	139784451	139784451			Not found	0
8	142934086	142934086			Not found	0
9	122135536	122135536			Not found	0
9	135355357	135355357			Not found	0
9	138660959	138660959			Not found	0
9	140030817	140030817	GRIN1	+	downstream	1025
9	140262191	140262191	EXD3	-	downstream	107
10	830910	830910			Not found	0
10	1443808	1443808			Not found	0
10	50340467	50340467	FAM170B	-	upstream	586
10	66606503	66606503			Not found	0
10	77887141	77887141			Not found	0
10	100843964	100843964			Not found	0
10	118885838	118885838	KIAA1598	-	overlapping	0
10	131637108	131637108			Not found	0
10	132157801	132157801			Not found	0
10	133606493	133606493			Not found	0
10	133932255	133932255			Not found	0
10	135029462	135029462			Not found	0
10	135050356	135050356	VENTX	+	overlapping	0
11	42275364	42275364	CTD-2572N17.1	-	overlapping	0
11	55587091	55587091	OR5D18	+	overlapping	0
11	115860987	115860987			Not found	0
11	126525030	126525030	RP11-115C10.1	+	overlapping	0
12	4384402	4384402	RP11-264F23.4	-	overlapping	0
12	10565230	10565230	RP11-277P12.7	-	downstream	1485
12	13812337	13812337			Not found	0
12	19459302	19459302			Not found	0
12	21167767	21167767	SLCO1B7	+	overlapping	0
12	31079809	31079809	TSPAN11	+	overlapping	0
12	58766207	58766207			Not found	0
12	81545136	81545136	ACSS3	+	overlapping	0
12	81663573	81663573	RP11-121G22.3	+	overlapping	0
12	130766092	130766092			Not found	0
12	130937300	130937300			Not found	0
12	131002919	131002919	RIMBP2	-	overlapping	0
12	132186770	132186770			Not found	0
12	132616047	132616047			Not found	0
12	132680973	132680973			Not found	0
13	69555908	69555908			Not found	0
13	83288028	83288028			Not found	0
13	88840549	88840549			Not found	0
13	114302416	114302416			Not found	0
13	114770179	114770179			Not found	0
13	114879530	114879530			Not found	0
14	25604579	25604579			Not found	0
14	28192482	28192482			Not found	0
14	29709375	29709375			Not found	0
14	30661303	30661303	PRKD1	-	overlapping	0
14	37134255	37134255	PAX9	+	overlapping	0
14	42831367	42831367	CTD-2307P3.1	+	overlapping	0
14	44922660	44922660			Not found	0
14	46533018	46533018	RP11-1A16.1	+	overlapping	0
14	87652829	87652829			Not found	0
14	100969984	100969984	WDR25	+	overlapping	0
15	58357166	58357166	CTD-2330J20.2	+	overlapping	0
15	61395263	61395263			Not found	0
15	62548920	62548920			Not found	0
15	62558605	62558605			Not found	0
15	73734745	73734745	C15orf60	+	overlapping	0
15	88874453	88874453			Not found	0
15	92715758	92715758	RP11-24J19.1	-	overlapping	0
16	31483444	31483444	TGFB1I1	+	overlapping	0
16	50903644	50903644			Not found	0
16	63652674	63652674			Not found	0
16	65410712	65410712			Not found	0
17	2966829	2966829			Not found	0
17	6735273	6735273	TEKT1	-	overlapping	0
17	32484036	32484036	ACCN1	-	overlapping	0
17	43978705	43978705			Not found	0
17	45810866	45810866	TBX21	+	overlapping	0
17	57642418	57642418	DHX40	+	overlapping	0
17	62050469	62050469	SCN4A	-	overlapping	0
17	72461210	72461210	CD300A	+	downstream	312
18	966088	966088			Not found	0
18	22344248	22344248			Not found	0
18	31739203	31739203			Not found	0
18	35142896	35142896			Not found	0
18	41001011	41001011			Not found	0
18	53815178	53815178			Not found	0
18	64161798	64161798			Not found	0
18	66669818	66669818			Not found	0
18	76552910	76552910			Not found	0
18	76739027	76739027	SALL3	+	downstream	248
18	77339229	77339229			Not found	0
19	4767834	4767834	MIR7-3HG	+	downstream	283
19	15851121	15851121	OR10H3	+	downstream	82
19	56444552	56444552	NLRP13	-	overlapping	0
20	1987284	1987284			Not found	0
20	5451662	5451662	RP5-828H9.1	+	overlapping	0
20	29943327	29943327			Not found	0
20	33585189	33585189			Not found	0
20	56532368	56532368	RP13-379L11.2	-	upstream	1348
21	18236494	18236494			Not found	0
21	31860474	31860474	KRTAP19-2	-	overlapping	0
21	46894788	46894788			Not found	0
