# Supplementary material for: Placental uptake and metabolism of 25(OH)vitamin D determine its activity within the fetoplacental unit
Source: eLife. 2022 Mar 8;11:e71094. doi: 10.7554/eLife.71094 (PMC8903835; doi:10.7554/eLife.71094)
Supplement: Table 1—source data 1. [file elife-71094-table1-data1.xlsx]

## Sheet: Sheet1
	Placenta #	Sex	VDR ratio to HKG
	284	2	0.66			1, male
	145	1	1.24			2, female
	78	1	0.53
	255	2	0.67
	110	2	2.15
	152	2	0.79			PARTIAL CORR
	230	2	1.09			/VARIABLES=VDR WITH 'offspring variable' BY babysex (dGA for birth data)
	28	2	1.17			/SIGNIFICANCE=TWOTAIL
	111	2	1.43			/MISSING=ANALYSIS.
	121	2	1.94
	6	1	0.41
	224	2	0.66
	4	1	0.49
	258	2	1.42
	66	2	1.07
	149	2	1.23
	72	1	1.68
	192	1	1.13
	71	1	1.16
	136	1	0.75
	288	2	0.76
	120	1	1.04
	197	1	0.83
	67	1	0.54
	70	2
	62	1	1.25
	276	1	1.09
	55	1	0.56
	126	2	1.31
	115	2	1.7
	33	2	0.65
	75	1	0.75
	233	2	1.23
	183	1	1.14
	42	2	0.78
	7	1	0.55
	93	1	0.6
	170	1	2.18
	15	1	0.48
	146	1	0.38
	116	1	2.13
	80	2	0.75
	244	1	0.58
	242	1	0.74
	148	1	1.12
	153	2	0.95
	44	1	0.89
	184	2	1.49
	30	1	1.43
	291	2	1.15
	125	2	1.25
	19	2	1.17
	287	2	1.81
	109	1	0.81
	20	1	0.93
	286	2	0.81
	90	2	0.8
	122	2	0.87
	141	1	1.35
	155	2	1.63
	113	2	1.35
	123	1	0.65
	211	2	0.54
	128	2	2.32
	221	2
	34	2	0.47
	235	2	0.58
	81	1	0.61
	201	1	0.99
	138	1	1.42
	87	2	0.72
	29	2	0.58
	172	2	1.6
	68	1	0.75
	53	2	0.63
	127	2	1.5
	186	1	0.02
	160	1	2.36
	76	1	0.63
	254	1	0.73
	181	2	0.52
	161	1	1.35
	187	1	1.18
	194	1	1.15
	97	1	1.64
	117	1	1.28
	112	1	1.29
	226	1	0.55
	248	1	1.79
	232	1	0.76
	252	2	0.73
	139	1	0.72
	280	2	0.65
	228	1	0.77
	237	2	1.24
	156	1	0.77
	265	2	1.88
	239	2	1.02
	245	2	0.5
	188	2	0.96
	285	1	0.92
	229	1	0.76
